# Supplementary material for: Impact of Training Discipline and Experience on Inhibitory Control and Cognitive Performance in Pet Dogs
Source: MDPI journal article supplement (doi:10.3390/ani14030428), 2024-01-29
Supplement: s1 [file animals-2814215-supplementary.pdf › animals-2814215-supplementary.pdf]

## **Supplementary material for ‘Impact of Training Discipline and Experience on Inhibitory Control and Cognitive Performance in Pet Dogs’**

**Authors: Nerys Mellor, Sebastian McBride, Emma Stoker and Sarah Dalesman.**

### **Abbreviated Survey details:**

We have removed questions related to confirmation that owners/handlers are over 18 and agree to their data being anonymised and used for the purposes of publication. We have also removed questions we used to gather participant contact details, first name, phone number and e-mail address, and their availability to take part in the cognitive trials. We confirmed whether dogs or handlers had any allergies, and if the dog had any history of reactivity towards other dogs. This was used to schedule dogs so there was no possibility of overlap in time with other participants. We also confirmed if the dog had any aggression towards humans, which excluded them from the study. Background information on dogs gathered via survey and used for analysis (\* = must answer):

#### **What sex is your dog? \***

male

female

#### **What is the neuter status of your dog? \***

Neutered

Entire

#### **How old is your dog? \***

< 12 months

1 - 2 years

2 - 4 years

4 - 6 years

6 - 8 years

> 8 years

#### **What breed is your dog? \***

Free text response

#### **Does your dog have any formal background in obedience training? If yes, please proceed to the next question. If no, please skip the next question. \***

Yes

No

#### **What level of obedience training has your dog achieved?**

Introductory class level - heelwork (lead only), recall, and use of a toy/food as reward.

Pre-Beginner class level - heelwork on lead, heelwork free, and recall.

Beginner class level - heelwork on lead, heelwork free, recall, and retrieve any article.

Novice class level - heelwork on lead, heelwork free, recall and retrieve a dumbbell.

Class A level - Heelwork free, recall, retrieve a dumbbell, handler scent discrimination.

Class B level - Heelwork free (fast and slow), send away and recall, retrieve one article supplied by a judge, handler scent discrimination with decoy scent.

Class C level - Heelwork free (fast and slow), send away and recall, retrieve one article supplied by the judge, distance control (sit, stand, down), judge scent discrimination with one or more decoy scent.

**Does your dog have any formal background in scent-work training? If yes, please proceed to the next questions - scent-work levels are provided for both ScentworkUK and for MantrailingUK, please select the relevant criteria for your dog whether that be one or both. If no, please skip the next questions.\***

Yes

No

**What level of scent-work has your dog achieved? (equivalent to ScentworkUk criteria levels).**

Level 1 - Dog to recognise one scent (cloves) on one article, in three out of four search areas with 3 minutes per search area.

Level 2 - Dog to recognise one scent (cloves) on two articles, in one perimeter and one exterior (item hidden) search, with five minutes per search area.

Level 3 - Dog to recognise two scents (cloves and gun oil), in one perimeter and one exterior (item hidden) search, with five minutes per search area.

Level 4 - Dog to recognise two scents (cloves and gun oil) with 2 distraction scents, in one perimeter and one exterior (item hidden) search, with five minutes per search area.

Level 5 - Dog to recognise two scents (cloves and gun oil) and find 9 out of 12 possible scented articles in both interior and exterior searches.

Level 6 - Dog to recognise three scents (cloves, gun oil, truffle oil) and find 9 out of 12 possible scented articles in both interior and exterior searches.

Level 7 - Dog to recognise three scents (cloves, gun oil, truffle oil) and find 9 out of 12 possible scented articles in both interior and exterior searches. Each search area to include a decoy, unscented, article.

**What level of scent-work training has your dog achieved? (equivalent to Mantrailing UK criteria Levels).**

Mantrailing UK Level 1 - single blind trail, 200-400m trail with 1 change of direction, 30 mins - 1 hour aged trail with 1 target person.

Mantrailing UK Level 2 - double blind trail, 400-600m trail with 2 changes of direction, 1-2 hour aged trail with 1 target person.

Mantrailing UK Level 3 - double blind trail, 600-1000m trail with 2 changes of direction, 2-4 hour aged trail with 1 target person 1 decoy.

**Does your dog have any formal background in agility training? \***

Yes

No

**What level of agility training has your dog received?**

Beginner - Can sequence some obstacles, but not currently doing all obstacles at full height.

Pre-competition - Can complete all obstacles but has not competed in any events.

Competition - Has competed in independent shows with all obstacles at full height but has not participated in KC or UKA competition.

Competition - Competing at KC Grade 1-3 or UKA beginner.

Competition - Competing at KC Grade 4-5 or UKA novice.

Competition - Competing at KC Grade 6-7 or UKA senior.

Competition - Competing at KC championship or UKA champion.

**Tables S1 to S5 include the data used for analysis.**

Table S1: Background Data, training experience, eye contact duration and number of stress signals (over 60 seconds). Final comments indicates whether the dogs were included in the analysis of A not B and Detour data. Those with a 'no' indication did not pass familiarisation stages due to over-stimulation or distraction.

| I.D | Sex    | Neuter status | Age         | Breed                       | Breed type | # Disciplines | Combined training level | Primary discipline | Eye contact (sec) | # Stress signals | A not B Analysis | Detour analysis |
|-----|--------|---------------|-------------|-----------------------------|------------|---------------|-------------------------|--------------------|-------------------|------------------|------------------|-----------------|
| 1   | Male   | Neutered      | > 8 years   | Springer Spaniel            | Gundog     | 3             | 9                       | Obedience          | No video          | No video         | yes              | yes             |
| 2   | Female | Entire        | 2 - 4 years | Labrador Retriever          | Gundog     | 2             | 4                       | Scent              | No video          | No video         | yes              | yes             |
| 3   | Female | Entire        | 6 - 8 years | Labrador Retriever          | Gundog     | 2             | 8                       | Agility            | No video          | No video         | yes              | yes             |
| 4   | Male   | Neutered      | 6 - 8 years | Sheepdog                    | Pastoral   | 2             | 9                       | Agility            | 6.16              | 13               | yes              | yes             |
| 5   | Female | Neutered      | 6 - 8 years | Chihuahua x Jack Russell    | Other      | 3             | 6                       | Agility            | 0                 | 5                | yes              | yes             |
| 6   | Male   | Entire        | 2 - 4 years | Cardigan corgi              | Pastoral   | 3             | 4                       | Obedience          | 3.95              | 2                | yes              | yes             |
| 7   | Female | Entire        | < 12 months | Border collie               | Pastoral   | 0             | 0                       | N/A                | 26.32             | 1                | yes              | yes             |
| 8   | Male   | Neutered      | 1 - 2 years | Welsh sheepdog              | Pastoral   | 2             | 7                       | Agility            | 1.63              | 7                | yes              | yes             |
| 9   | Female | Neutered      | 2 - 4 years | Lurcher                     | Other      | 2             | 7                       | Agility            | 0                 | 9                | yes              | yes             |
| 10  | Male   | Entire        | 4 - 6 years | Boston Terrier              | Other      | 2             | 5                       | Obedience          | 0                 | 1                | no               | yes             |
| 11  | Female | Entire        | 2 - 4 years | Rottweiler                  | Other      | 2             | 6                       | Obedience          | 15.56             | 7                | yes              | yes             |
| 12  | Male   | Neutered      | > 8 years   | Rottweiler                  | Other      | 2             | 7                       | Obedience          | 28.49             | 4                | yes              | yes             |
| 13  | Male   | Neutered      | 4 - 6 years | Labrador Retriever          | Gundog     | 0             | 0                       | N/A                | 19.85             | 3                | yes              | yes             |
| 14  | Female | Entire        | 1 - 2 years | Dobermann                   | Other      | 0             | 0                       | N/A                | 1.98              | 8                | yes              | yes             |
| 15  | Female | Entire        | 2 - 4 years | Dobermann                   | Other      | 1             | 2                       | Scent              | 2.56              | 2                | no               | no              |
| 16  | Female | Entire        | < 12 months | Welsh sheepdog              | Pastoral   | 1             | 1                       | Obedience          | 5.31              | 5                | no               | no              |
| 17  | Male   | Entire        | < 12 months | Huntaway x border collie    | Pastoral   | 1             | 1                       | Obedience          | 4.58              | 13               | yes              | yes             |
| 18  | Male   | Entire        | 2 - 4 years | Cardigan Welsh Corgi        | Pastoral   | 1             | 1                       | Obedience          | 0                 | 2                | yes              | yes             |
| 19  | Female | Neutered      | > 8 years   | Cardigan Welsh Corgi        | Pastoral   | 2             | 4                       | Agility            | 10.47             | 6                | yes              | yes             |
| 20  | Female | Neutered      | > 8 years   | Mixed terrier               | Other      | 1             | 1                       | Scent              | 6.58              | 2                | yes              | yes             |
| 21  | Female | Neutered      | > 8 years   | Sheepdog                    | Pastoral   | 2             | 4                       | Obedience          | 22.41             | 2                | yes              | yes             |
| 22  | Female | Neutered      | > 8 years   | Border Collie Cross (mixed) | Pastoral   | 0             | 0                       | N/A                | 0.91              | 6                | yes              | yes             |
| 23  | Female | Neutered      | 1 - 2 years | Border Collie               | Pastoral   | 2             | 2                       | Scent              | 3.72              | 9                | yes              | yes             |
| 24  | Male   | Entire        | 2 - 4 years | Springer spaniel            | Gundog     | 1             | 3                       | Scent              | 15.19             | 0                | yes              | yes             |

|    |        |          |                |                              |          |   |    |           |       |    |     |     |
|----|--------|----------|----------------|------------------------------|----------|---|----|-----------|-------|----|-----|-----|
| 25 | Female | Entire   | 6 - 8 years    | Labrador Retriever           | Gundog   | 2 | 4  | Scent     | 54.23 | 14 | yes | yes |
| 26 | Female | Entire   | 2 - 4 years    | Labrador Retriever           | Gundog   | 2 | 5  | Scent     | 33.27 | 3  | yes | yes |
| 27 | Female | Neutered | 2 - 4 years    | Foxhound X<br>Huntaway       | Pastoral | 2 | 7  | Obedience | 34.43 | 7  | yes | yes |
| 28 | Male   | Neutered | 4 - 6 years    | Labrador                     | Gundog   | 3 | 5  | Agility   | 0     | 5  | yes | yes |
| 29 | Female | Neutered | 6 - 8 years    | Springer spaniel x<br>poodle | Gundog   | 3 | 10 | Obedience | 13.3  | 7  | yes | yes |
| 30 | Male   | Neutered | 2 - 4 years    | Border collie x<br>poodle    | Pastoral | 3 | 7  | Obedience | 35.36 | 17 | yes | yes |
| 31 | Female | Entire   | 1 - 2 years    | Golden retriever X           | Gundog   | 1 | 4  | Obedience | 11.61 | 12 | yes | yes |
| 32 | Female | Neutered | 2 - 4 years    | Welsh sheep dog              | Pastoral | 2 | 5  | Obedience | 0     | 0  | yes | yes |
| 33 | Female | Neutered | 2 - 4 years    | Terrier X                    | Other    | 2 | 4  | Obedience | 0.82  | 5  | yes | yes |
| 34 | Male   | Neutered | 2 - 4 years    | Border Collie X<br>Huntaway  | Pastoral | 2 | 3  | Obedience | 27.5  | 12 | yes | yes |
| 35 | Female | Entire   | < 12<br>months | Husky x Belgian<br>Malinois  | Pastoral | 1 | 1  | Scent     | 3.54  | 3  | yes | yes |
| 36 | Female | Neutered | 2 - 4 years    | Husky x border<br>collie     | Pastoral | 1 | 2  | Scent     | 0     | 2  | yes | yes |
| 37 | Female | Entire   | 2 - 4 years    | Border Collie                | Pastoral | 3 | 5  | Agility   | 38.96 | 3  | yes | yes |
| 38 | Male   | Entire   | 2 - 4 years    | Springer spaniel             | Gundog   | 2 | 3  | Scent     | 6.01  | 6  | yes | yes |
| 39 | Female | Neutered | 1 - 2 years    | Labrador X Pointer           | Gundog   | 2 | 3  | Scent     | 1.39  | 0  | yes | yes |
| 40 | Female | Entire   | 2 - 4 years    | Border collie                | Pastoral | 1 | 4  | Obedience | 1.32  | 1  | yes | yes |

Table S2: A not B trial data indicating success rate at each stage for the A not B trials.

| ID | Passed familiarisation | Passed 'A' training stage | Trials to pass training | AnotB TEST Success 8/10 | Trial 1st correct choice TEST | AnotB Category       |
|----|------------------------|---------------------------|-------------------------|-------------------------|-------------------------------|----------------------|
| 1  | Yes                    | Yes                       | 5                       | Yes                     | 2                             | PASS_TRAIN_PASS_TEST |
| 2  | Yes                    | Yes                       | 5                       | No                      | 4                             | PASS_TRAIN_FAIL_TEST |
| 3  | Yes                    | Yes                       | 5                       | Yes                     | 1                             | PASS_TRAIN_PASS_TEST |
| 4  | Yes                    | Yes                       | 5                       | No                      | 3                             | PASS_TRAIN_FAIL_TEST |
| 5  | Yes                    | Yes                       | 5                       | No                      | 1                             | PASS_TRAIN_FAIL_TEST |
| 6  | Yes                    | Yes                       | 11                      | No                      | 2                             | PASS_TRAIN_FAIL_TEST |
| 7  | Yes                    | Yes                       | 5                       | Yes                     | 2                             | PASS_TRAIN_PASS_TEST |
| 8  | Yes                    | Yes                       | 5                       | Yes                     | 2                             | PASS_TRAIN_PASS_TEST |
| 9  | Yes                    | Yes                       | 5                       | Yes                     | 1                             | PASS_TRAIN_PASS_TEST |
| 10 | No                     | N/A                       | N/A                     | N/A                     | N/A                           | N/A                  |
| 11 | Yes                    | Yes                       | 5                       | Yes                     | 1                             | PASS_TRAIN_PASS_TEST |
| 12 | Yes                    | Yes                       | 5                       | Yes                     | 1                             | PASS_TRAIN_PASS_TEST |
| 13 | Yes                    | Yes                       | 5                       | No                      | 2                             | PASS_TRAIN_FAIL_TEST |
| 14 | Yes                    | No                        | Failed                  | N/A                     | N/A                           | FAIL_TRAIN           |
| 15 | No                     | N/A                       | N/A                     | N/A                     | N/A                           | N/A                  |
| 16 | No                     | N/A                       | N/A                     | N/A                     | N/A                           | N/A                  |
| 17 | Yes                    | No                        | Failed                  | N/A                     | N/A                           | FAIL_TRAIN           |
| 18 | Yes                    | No                        | Failed                  | N/A                     | N/A                           | FAIL_TRAIN           |
| 19 | Yes                    | Yes                       | 5                       | No                      | 6                             | PASS_TRAIN_FAIL_TEST |
| 20 | Yes                    | Yes                       | 5                       | Yes                     | 1                             | PASS_TRAIN_PASS_TEST |
| 21 | Yes                    | Yes                       | 5                       | No                      | 1                             | PASS_TRAIN_FAIL_TEST |
| 22 | Yes                    | Yes                       | 5                       | No                      | No correct choice during TEST | PASS_TRAIN_FAIL_TEST |
| 23 | Yes                    | Yes                       | 5                       | No                      | N/A                           | PASS_TRAIN_FAIL_TEST |
| 24 | Yes                    | Yes                       | 5                       | Yes                     | 1                             | PASS_TRAIN_PASS_TEST |
| 25 | Yes                    | Yes                       | 5                       | Yes                     | 1                             | PASS_TRAIN_PASS_TEST |
| 26 | Yes                    | Yes                       | 5                       | No                      | 1                             | PASS_TRAIN_FAIL_TEST |
| 27 | Yes                    | Yes                       | 5                       | Yes                     | 2                             | PASS_TRAIN_PASS_TEST |
| 28 | Yes                    | Yes                       | 5                       | No                      | 1                             | PASS_TRAIN_FAIL_TEST |
| 29 | Yes                    | Yes                       | 6                       | Yes                     | 1                             | PASS_TRAIN_PASS_TEST |
| 30 | Yes                    | Yes                       | 6                       | Yes                     | 1                             | PASS_TRAIN_PASS_TEST |
| 31 | Yes                    | Yes                       | 5                       | No                      | 1                             | PASS_TRAIN_FAIL_TEST |

|    |     |     |        |     |                               |                      |
|----|-----|-----|--------|-----|-------------------------------|----------------------|
| 32 | Yes | Yes | 5      | Yes | 1                             | PASS_TRAIN_PASS_TEST |
| 33 | Yes | Yes | 5      | Yes | 1                             | PASS_TRAIN_PASS_TEST |
| 34 | Yes | Yes | 5      | No  | No correct choice during TEST | PASS_TRAIN_FAIL_TEST |
| 35 | Yes | No  | Failed | N/A | N/A                           | FAIL_TRAIN           |
| 36 | Yes | Yes | 5      | No  | 2                             | PASS_TRAIN_FAIL_TEST |
| 37 | Yes | Yes | 5      | Yes | 1                             | PASS_TRAIN_PASS_TEST |
| 38 | Yes | Yes | 5      | Yes | 1                             | PASS_TRAIN_PASS_TEST |
| 39 | Yes | Yes | 8      | Yes | 1                             | PASS_TRAIN_PASS_TEST |
| 40 | Yes | Yes | 5      | No  | 4                             | PASS_TRAIN_FAIL_TEST |

Table S3: A not B trial data including number of correct choices, preservative error rate and speed to select a cup (sec) for dogs that completed all 10 TEST trials. Dogs are excluded if they did not pass the familiarisation or training phase, or if they exhibited stress during the test phase.

| ID | # correct | Perservative error rate | Trial 1 | Trial 2 | Trial 3 | Trial 4 | Trial 5 | Trial 6 | Trial 7 | Trial 8 | Trial 9 | Trial 10 | Average Speed |
|----|-----------|-------------------------|---------|---------|---------|---------|---------|---------|---------|---------|---------|----------|---------------|
| 1  | 9         | 1                       | 2.05    | 1.58    | 1.82    | 1.72    | 1.81    | 1.68    | 1.61    | 1.44    | 1.86    | 1.46     | 1.703         |
| 2  | 5         | 5                       | 3.58    | 3.27    | 3.44    | 3.39    | 3.19    | 3.27    | 3.32    | 3.12    | 2.36    | 2.29     | 3.123         |
| 3  | 9         | 1                       | 2.29    | 3.71    | 2.25    | 2.61    | 2.13    | 2.75    | 2.06    | 2.17    | 2.37    | 1.91     | 2.425         |
| 4  | 3         | 7                       | 2       | 2.38    | 2.72    | 2.28    | 2.26    | 2.24    | 2.44    | 2.77    | 3.03    | 2.96     | 2.508         |
| 5  | 5         | 5                       | 3.15    | 2.87    | 3.18    | 3.98    | 4.53    | 3.9     | 4.78    | 5.68    | 3.67    | 3.29     | 3.903         |
| 6  | 5         | 5                       | 5.33    | 4.84    | 4.46    | 6       | 5.7     | 8.82    | 5.87    | 5.8     | 4.16    | 4.5      | 5.548         |
| 7  | 9         | 1                       | 1.91    | 2.15    | 1.71    | 1.68    | 2.13    | 1.57    | 1.65    | 1.52    | 1.74    | 1.69     | 1.775         |
| 8  | 9         | 1                       | 1.76    | 2.76    | 2.44    | 2.33    | 2.04    | 2.12    | 2.28    | 2.11    | 2.33    | 2.31     | 2.248         |
| 9  | 10        | 0                       | 1.68    | 2.41    | 2.05    | 2.16    | 1.99    | 1.95    | 1.93    | 2.1     | 2.05    | 1.89     | 2.021         |
| 11 | 10        | 0                       | 1.81    | 1.98    | 2.38    | 1.69    | 1.78    | 1.85    | 1.72    | 1.71    | 1.95    | 1.82     | 1.869         |
| 12 | 10        | 0                       | 2.25    | 2.32    | 2.36    | 2.84    | 2.33    | 2.35    | 2.26    | 2.28    | 2.12    | 2.69     | 2.38          |
| 13 | 6         | 4                       | 2.18    | 5.89    | 2.16    | 1.79    | 1.68    | 1.52    | 1.85    | 1.92    | 1.85    | 1.68     | 2.252         |
| 19 | 2         | 8                       | 1.89    | 2.33    | 2.39    | 2.77    | 2.18    | 5.88    | 4.32    | 2.9     | 5.41    | 4.61     | 3.468         |
| 20 | 10        | 0                       | 2.04    | 1.89    | 1.81    | 1.95    | 2.06    | 2.05    | 2.13    | 1.92    | 1.66    | 1.61     | 1.912         |
| 21 | 6         | 4                       | 4.06    | 9.13    | 3.59    | 3.84    | 3.77    | 4.24    | 4.16    | 4.07    | 3.15    | 3.51     | 4.352         |
| 23 | 0         | 10                      | 2.06    | 2.05    | 2.51    | 2.76    | 2.33    | 2.25    | 2.51    | 2.89    | 2.63    | 8.61     | 3.06          |
| 24 | 10        | 0                       | 1.36    | 1.4     | 1.34    | 1.49    | 1.46    | 1.48    | 1.31    | 1.29    | 1.2     | 1.26     | 1.359         |
| 25 | 10        | 0                       | 1.22    | 1.4     | 1.42    | 1.29    | 1.31    | 1.26    | 1.29    | 1.21    | 1.24    | 1.27     | 1.291         |
| 26 | 7         | 4                       | 2.01    | 1.74    | 1.73    | 1.8     | 1.84    | 1.47    | 1.64    | 1.74    | 1.9     | 1.54     | 1.741         |
| 27 | 9         | 1                       | 1.41    | 1.38    | 1.36    | 1.35    | 1.52    | 1.35    | 1.46    | 1.35    | 1.42    | 1.36     | 1.396         |
| 28 | 2         | 8                       | 1.57    | 1.59    | 1.68    | 1.47    | 1.81    | 1.59    | 1.65    | 1.84    | 1.8     | 1.78     | 1.678         |
| 29 | 10        | 0                       | 1.33    | 1.44    | 1.28    | 1.27    | 1.36    | 1.42    | 1.39    | 1.36    | 1.47    | 1.38     | 1.37          |
| 30 | 9         | 1                       | 4.4     | 4.2     | 4.86    | 4.29    | 4.71    | 3.83    | 2.34    | 2.68    | 3.14    | 5.75     | 4.02          |
| 31 | 7         | 4                       | 2.03    | 1.64    | 2.41    | 1.65    | 2.43    | 2.91    | 4.93    | 2.07    | 1.99    | 4.9      | 2.696         |
| 32 | 10        | 0                       | 2.7     | 1.7     | 1.67    | 1.48    | 1.61    | 1.72    | 1.83    | 1.62    | 1.85    | 1.84     | 1.802         |
| 33 | 10        | 0                       | 1.43    | 1.32    | 1.37    | 1.33    | 1.22    | 1.16    | 1.2     | 1.28    | 1.18    | 1.14     | 1.263         |
| 36 | 6         | 4                       | 1.87    | 2.09    | 1.56    | 1.47    | 1.22    | 1.72    | 2.08    | 1.61    | 1.57    | 1.48     | 1.667         |
| 37 | 10        | 0                       | 1.49    | 1.45    | 1.42    | 1.39    | 1.27    | 1.48    | 1.32    | 1.36    | 1.38    | 1.48     | 1.404         |
| 38 | 9         | 1                       | 1.1     | 1.21    | 1.15    | 1.19    | 1.11    | 1.25    | 1.13    | 1.09    | 1.19    | 1.27     | 1.169         |
| 39 | 10        | 0                       | 1.43    | 1.52    | 1.75    | 1.64    | 1.56    | 1.62    | 1.58    | 1.73    | 1.67    | 1.75     | 1.625         |
| 40 | 4         | 6                       | 4.83    | 11.92   | 2.22    | 3.11    | 9.78    | 7.61    | 7.4     | 1.45    | 4.08    | 3.71     | 5.611         |

Table S4: Detour task showing success rate, number of trials completed and first trial on which dogs successfully detoured without error.

| I.D | DT success (8/10 direct) | Trials completed | First direct trial |
|-----|--------------------------|------------------|--------------------|
| 1   | Fail                     | 10               | 1                  |
| 2   | Fail                     | 10               | 3                  |
| 3   | Fail                     | 10               | 2                  |
| 4   | Fail                     | 10               | 2                  |
| 5   | Fail                     | 8                | 1                  |
| 6   | Fail                     | 10               | 1                  |
| 7   | Success                  | 10               | 3                  |
| 8   | Success                  | 10               | 3                  |
| 9   | Fail                     | 10               | 5                  |
| 10  | Fail                     | 10               | 4                  |
| 11  | Success                  | 10               | 1                  |
| 12  | Fail                     | 10               | 4                  |
| 13  | Fail                     | 10               | 4                  |
| 14  | Fail                     | 4                | 1                  |
| 15  | No attempt               | N/A              | N/A                |
| 16  | No attempt               | N/A              | N/A                |
| 17  | Fail                     | 10               | 2                  |
| 18  | Fail                     | 10               | 1                  |
| 19  | Fail                     | 10               | 1                  |
| 20  | Fail                     | 10               | 6                  |
| 21  | Fail                     | 3                | No direct trials   |
| 22  | Fail                     | 3                | 1                  |
| 23  | Fail                     | 5                | No direct trials   |
| 24  | Fail                     | 10               | 5                  |
| 25  | Success                  | 10               | 1                  |
| 26  | Success                  | 10               | 3                  |
| 27  | Fail                     | 3                | 1                  |
| 28  | Fail                     | 10               | No direct trials   |
| 29  | Success                  | 10               | 1                  |
| 30  | Success                  | 10               | 1                  |
| 31  | Success                  | 10               | 1                  |



|    |         |    |     |
|----|---------|----|-----|
| 32 | Success | 10 | 3   |
| 33 | Success | 10 | 1   |
| 34 | Success | 10 | 1   |
| 35 | Fail    | 10 | N/A |
| 36 | Success | 10 | 1   |
| 37 | Fail    | 10 | 6   |
| 38 | Success | 10 | 1   |
| 39 | Success | 10 | 1   |
| 40 | Fail    | 10 | 6   |

Table S5: Detour task trial data only including dogs that completed all 10 detour task trials, including direct detour rate, error rate and detour time (sec).

| I.D | # Direct trials | Contact errors | Path errors | Total errors | Trial 1 | Trial 2 | Trial 3 | Trial 4 | Trial 5 | Trial 6 | Trial 7 | Trial 8 | Trial 9 | Trial 10 | Average Speed |
|-----|-----------------|----------------|-------------|--------------|---------|---------|---------|---------|---------|---------|---------|---------|---------|----------|---------------|
| 1   | 2               | 8              | 8           | 16           | 2.76    | 5.39    | 4.96    | 4.47    | 3.65    | 9.44    | 17.39   | 4.7     | 9.71    | 3.51     | 6.598         |
| 2   | 6               | 2              | 4           | 6            | 7.28    | 5.36    | 3.37    | 3.21    | 3.46    | 3.28    | 3.01    | 3.36    | 2.76    | 3.32     | 3.841         |
| 3   | 7               | 1              | 3           | 4            | 4.12    | 2.7     | 2.77    | 2.71    | 2.36    | 2.37    | 2.73    | 2.59    | 2.5     | 2.52     | 2.737         |
| 4   | 7               | 1              | 3           | 4            | 22.37   | 4.56    | 6.15    | 3.86    | 3.52    | 3.79    | 3.58    | 3.32    | 3.54    | 3.29     | 5.798         |
| 6   | 6               | 1              | 4           | 5            | 7.23    | 6.74    | 8       | 22.73   | 8.2     | 14.17   | 6.46    | 23.95   | 5.68    | 8.95     | 11.211        |
| 7   | 8               | 2              | 2           | 4            | 6.52    | 3.41    | 2.86    | 3.05    | 2.79    | 2.84    | 2.79    | 2.79    | 2.42    | 2.8      | 3.227         |
| 8   | 8               | 2              | 2           | 4            | 11.36   | 4.87    | 4.07    | 2.97    | 2.82    | 2.83    | 2.86    | 2.67    | 2.69    | 2.55     | 3.969         |
| 9   | 6               | 2              | 4           | 6            | 10.79   | 8.45    | 2.75    | 2.72    | 2.68    | 2.22    | 1.79    | 2.72    | 2.71    | 2.85     | 3.968         |
| 10  | 7               | 0              | 3           | 3            | 6.95    | 33.74   | 20.02   | 3.5     | 2.85    | 2.76    | 2.57    | 2.59    | 3.22    | 2.91     | 8.111         |
| 11  | 9               | 4              | 0           | 4            | 2.45    | 2.76    | 2.81    | 3.18    | 2.85    | 2.79    | 3.19    | 3.21    | 4.78    | 4.21     | 3.223         |
| 12  | 5               | 3              | 5           | 8            | 11.59   | 6.81    | 4.28    | 3.02    | 4.42    | 3.85    | 3.24    | 3.71    | 3.98    | 3.43     | 4.833         |
| 13  | 7               | 0              | 3           | 3            | 14.94   | 39.2    | 4.85    | 3.25    | 3.29    | 3.26    | 3.14    | 2.97    | 3.11    | 3.8      | 8.181         |
| 17  | 6               | 0              | 4           | 4            | 5.02    | 5.26    | 28.93   | 3.66    | 5.58    | 3.8     | 7.8     | 8       | 5.64    | 5.24     | 7.893         |
| 18  | 3               | 0              | 7           | 7            | 2.55    | 2.97    | 5.3     | 3.14    | 24.01   | 38.94   | 17.49   | 7.97    | 30.91   | 21.57    | 15.485        |
| 19  | 5               | 0              | 5           | 5            | 5.26    | 35.53   | 36.77   | 36.81   | 5.83    | 16.12   | 34.76   | 4.03    | 3.46    | 3.33     | 18.19         |
| 20  | 5               | 0              | 5           | 5            | 7.02    | 10.65   | 3.71    | 3.03    | 3.79    | 3.91    | 3.28    | 3.39    | 4.06    | 3.69     | 4.653         |
| 24  | 4               | 1              | 6           | 7            | 4.54    | 3.03    | 3.16    | 7.4     | 3.04    | 4.53    | 7.19    | 2.47    | 2.77    | 2.89     | 4.102         |
| 25  | 8               | 0              | 2           | 2            | 3.04    | 3.22    | 3.3     | 4.94    | 3.31    | 3.26    | 3.32    | 3.6     | 3.79    | 3.6      | 3.538         |
| 26  | 8               | 0              | 2           | 2            | 5.54    | 9.04    | 3.79    | 3.88    | 3.44    | 3.3     | 3.43    | 3.92    | 3.56    | 3.79     | 4.369         |
| 28  | 0               | 0              | 10          | 10           | 26.39   | 5.89    | 2.93    | 2.86    | 2.58    | 2.85    | 2.74    | 2.96    | 3.11    | 3.72     | 5.603         |
| 29  | 10              | 0              | 0           | 0            | 3.03    | 2.37    | 2.52    | 2.73    | 2.53    | 2.76    | 2.64    | 2.82    | 2.71    | 2.91     | 2.702         |
| 30  | 10              | 0              | 0           | 0            | 2.43    | 2.94    | 2.61    | 2.62    | 2.37    | 2.6     | 2.66    | 2.82    | 2.95    | 2.68     | 2.668         |
| 31  | 9               | 0              | 1           | 1            | 3.04    | 2.47    | 2.61    | 2.49    | 2.69    | 2.41    | 4.87    | 2.29    | 2.35    | 2.61     | 2.783         |
| 32  | 8               | 0              | 2           | 2            | 5.87    | 5.02    | 2.97    | 2.91    | 3.03    | 2.9     | 2.94    | 3.06    | 3.08    | 3.02     | 3.48          |
| 33  | 10              | 0              | 0           | 0            | 2.42    | 2.53    | 2.4     | 2.52    | 2.53    | 2.46    | 2.47    | 2.43    | 2.35    | 2.51     | 2.462         |
| 34  | 10              | 1              | 0           | 1            | 2.46    | 2.56    | 2.81    | 2.78    | 2.31    | 2.49    | 3.11    | 2.87    | 2.44    | 2.8      | 2.663         |
| 35  | 0               | 0              | 10          | 10           | 7.01    | 5.79    | 4.68    | 22.15   | 9.03    | 4.7     | 5.35    | 10.3    | 5.33    | 6.67     | 8.101         |
| 36  | 9               | 0              | 1           | 1            | 2.6     | 2.38    | 2.75    | 2.71    | 2.44    | 3.06    | 2.96    | 2.77    | 4.84    | 4.41     | 3.092         |
| 37  | 5               | 0              | 5           | 5            | 18.59   | 23.97   | 7.38    | 3.25    | 7.98    | 2.55    | 2.57    | 2.67    | 2.32    | 2.91     | 7.419         |
| 38  | 10              | 0              | 0           | 0            | 3.81    | 2.97    | 2.91    | 2.61    | 2.51    | 2.52    | 2.49    | 3.05    | 2.92    | 2.51     | 2.83          |
| 39  | 8               | 0              | 2           | 2            | 3.17    | 3.53    | 2.97    | 2.82    | 3.18    | 2.9     | 2.38    | 3.04    | 2.99    | 3.01     | 2.999         |
| 40  | 2               | 4              | 8           | 12           | 12.87   | 6.22    | 7.03    | 8.61    | 12.1    | 3.5     | 6.76    | 6.84    | 3.5     | 4.95     | 7.238         |
